# Supplementary material for: Identification of Cultured and Natural Astragalus Root Based on Monosaccharide Mapping
Source: PubMed Central journal article supplement (PMC6331963; doi:10.3390/molecules200916466), 2015-09-11
Supplement: molecules-20-16466-s001.pdf [file molecules-20-16466-s001.pdf]

# Supporting Information

**Table S1.** Monosaccharide contents of Fraction A from different RA samples ( $\bar{X} \pm SD$ ) (mg/g).

| Content<br>No. | Varieties | Fraction A    |               |                 |                |                |
|----------------|-----------|---------------|---------------|-----------------|----------------|----------------|
|                |           | Glucose       | Fructose      | Inositol        | Sorbitol       | Galactitol     |
| 1              |           | 0.553 ± 0.090 | 0.469 ± 0.002 | 2.668 ± 0.230   | 2.346 ± 0.171  | 2.261 ± 0.170  |
| 2              |           | 0.022 ± 0.017 | 0.076 ± 0.020 | 0.338 ± 0.250   | 0.085 ± 0.031  | 0.184 ± 0.021  |
| 3              |           | 0.210 ± 0.020 | 0.026 ± 0.006 | 3.444 ± 0.390   | 0.789 ± 0.104  | 3.305 ± 0.900  |
| 4              |           | 1.595 ± 0.074 | 0.308 ± 0.090 | 15.739 ± 5.800  | 1.856 ± 0.134  | 8.999 ± 0.180  |
| 5              |           | 0.994 ± 0.080 | 0.102 ± 0.018 | 10.096 ± 0.1805 | 2.414 ± 0.142  | 3.512 ± 0.800  |
| 6              |           | 0.517 ± 0.033 | ND            | 22.774 ± 0.550  | 4.256 ± 0.075  | 14.91 ± 0.012  |
| 7              |           | 7.236 ± 0.350 | 1.855 ± 0.500 | 86.481 ± 9.700  | 8.004 ± 0.102  | 52.532 ± 0.400 |
| 8              |           | 1.933 ± 0.710 | 1.323 ± 0.130 | 33.567 ± 1.300  | 27.976 ± 0.144 | 42.429 ± 0.800 |
| 9              |           | 2.177 ± 0.920 | 1.161 ± 0.060 | 46.315 ± 1.100  | 3.933 ± 0.146  | 34.564 ± 0.140 |
| 10             |           | 1.509 ± 0.194 | 0.752 ± 0.060 | 28.492 ± 5.100  | 7.421 ± 0.116  | 10.553 ± 0.230 |
| 11             |           | 3.708 ± 0.310 | 1.131 ± 0.050 | 74.842 ± 4.800  | 2.955 ± 0.102  | 5.346 ± 0.370  |
| 12             |           | 2.792 ± 0.040 | ND            | 37.028 ± 4.200  | 2.954 ± 0.100  | 6.599 ± 0.500  |
| 13             |           | 0.051 ± 0.006 | 0.083 ± 0.000 | 0.842 ± 0.034   | 0.260 ± 0.043  | 1.035 ± 0.120  |
| 14             |           | 0.181 ± 0.023 | 0.143 ± 0.010 | 4.117 ± 0.010   | 0.250 ± 0.102  | 2.456 ± 0.350  |
| 15             |           | 0.804 ± 0.110 | 0.454 ± 0.000 | 1.529 ± 0.140   | 1.309 ± 0.470  | 1.800 ± 0.110  |
| 16             |           | 0.248 ± 0.057 | 0.102 ± 0.012 | 3.363 ± 0.130   | 1.433 ± 0.133  | 4.092 ± 0.160  |
| 17             |           | 0.097 ± 0.112 | 0.056 ± 0.030 | 1.160 ± 0.280   | 0.467 ± 0.101  | 0.447 ± 0.210  |
| 18             |           | 0.558 ± 0.131 | 0.248 ± 0.070 | 10.331 ± 0.790  | 0.465 ± 0.122  | 8.541 ± 0.020  |
| 19             |           | 4.705 ± 0.253 | 0.203 ± 0.085 | 45.472 ± 0.200  | 4.930 ± 0.094  | 67.719 ± 0.600 |
| 20             |           | 4.690 ± 0.340 | ND            | 32.051 ± 0.420  | 3.937 ± 0.102  | 28.616 ± 0.110 |
| 21             |           | 3.767 ± 0.220 | 2.514 ± 0.000 | 90.073 ± 3.200  | 9.077 ± 0.104  | 58.83 ± 0.300  |
| 22             |           | 3.281 ± 0.034 | 1.668 ± 0.200 | 46.249 ± 0.300  | 5.354 ± 0.056  | 35.124 ± 6.130 |
| 23             |           | 5.039 ± 0.187 | 1.758 ± 0.470 | 87.085 ± 2.400  | 21.162 ± 0.095 | 36.454 ± 3.130 |
| 24             |           | 1.325 ± 0.130 | 0.698 ± 0.055 | 35.997 ± 4.300  | 26.217 ± 0.720 | 18.562 ± 1.11  |

ND: Not detected. **1–24** stand for different RA samples, as shown in Table 8.

**Table S2.** Monosaccharide contents of Fraction B from different RA samples ( $\bar{X} \pm SD$ ) (mg/g).

| Content No. | Varieties | Fraction B    |               |               |                |               |                |                |
|-------------|-----------|---------------|---------------|---------------|----------------|---------------|----------------|----------------|
|             |           | Xylose        | Fucose        | Rhamnose      | Arabinose      | Galactose     | Mannose        | Glucose        |
| 1           |           | 0.169 ± 0.001 | 0.121 ± 0.001 | ND            | 1.158 ± 0.004  | 1.713 ± 0.001 | 11.294 ± 1.010 | 11.233 ± 0.990 |
| 2           |           | 1.878 ± 0.038 | ND            | ND            | 2.34 ± 0.016   | 3.327 ± 0.314 | 10.446 ± 1.330 | 12.247 ± 2.021 |
| 3           |           | 0.244 ± 0.244 | 0.021 ± 0.021 | ND            | 1.406 ± 0.081  | 2.301 ± 0.301 | 11.786 ± 1.786 | 11.813 ± 0.363 |
| 4           |           | 0.065 ± 0.008 | ND            | ND            | 1.082 ± 0.031  | 0.032 ± 0.008 | 10.443 ± 0.014 | 13.195 ± 2.800 |
| 5           |           | 0.169 ± 0.015 | 0.121 ± 0.002 | ND            | 1.158 ± 0.001  | 2.713 ± 0.502 | 11.294 ± 0.071 | 11.233 ± 1.010 |
| 6           |           | 1.721 ± 0.009 | 0.395 ± 0.001 | ND            | 1.927 ± 0.038  | ND            | 11.368 ± 0.018 | 19.592 ± 0.015 |
| 7           |           | 0.549 ± 0.003 | ND            | 0.386 ± 0.001 | 7.544 ± 0.039  | 2.604 ± 0.044 | 24.807 ± 0.735 | 28.758 ± 0.159 |
| 8           |           | 0.690 ± 0.034 | ND            | 0.597 ± 0.039 | 11.137 ± 0.069 | 3.328 ± 0.285 | 19.358 ± 0.358 | 31.516 ± 0.055 |
| 9           |           | 1.011 ± 0.033 | ND            | 0.928 ± 0.074 | 5.495 ± 0.052  | 1.054 ± 0.034 | 40.576 ± 0.741 | 43.108 ± 0.115 |
| 10          |           | ND            | 0.317 ± 0.013 | ND            | 4.215 ± 0.107  | 3.285 ± 0.139 | 19.920 ± 0.099 | 17.751 ± 0.110 |
| 11          |           | 2.209 ± 0.052 | ND            | ND            | 7.686 ± 0.036  | 2.005 ± 0.038 | 7.514 ± 0.113  | 10.164 ± 0.021 |
| 12          |           | 1.476 ± 0.034 | ND            | 1.125 ± 0.078 | 7.071 ± 0.041  | 6.777 ± 0.117 | 10.026 ± 0.458 | 22.995 ± 0.159 |
| 13          |           | 0.139 ± 0.009 | ND            | ND            | ND             | 0.298 ± 0.024 | 10.158 ± 1.900 | 10.157 ± 0.590 |
| 14          |           | 0.135 ± 0.010 | ND            | ND            | 1.213 ± 0.035  | 0.202 ± 0.010 | 10.228 ± 1.093 | 10.375 ± 0.101 |
| 15          |           | 0.303 ± 0.016 | ND            | ND            | 1.509 ± 0.001  | 0.850 ± 0.030 | 10.202 ± 1.180 | 10.609 ± 0.140 |
| 16          |           | 0.040 ± 0.012 | ND            | ND            | 1.694 ± 0.142  | ND            | 10.683 ± 0.340 | 10.537 ± 0.332 |
| 17          |           | 0.351 ± 0.040 | 0.067 ± 0.004 | ND            | 1.499 ± 0.007  | 0.516 ± 0.044 | 10.185 ± 1.010 | 10.767 ± 2.001 |
| 18          |           | 0.074 ± 0.008 | ND            | 0.012 ± 0.005 | ND             | ND            | 10.358 ± 0.490 | 10.262 ± 1.057 |
| 19          |           | 0.176 ± 0.004 | ND            | 0.157 ± 0.005 | 5.206 ± 0.010  | 1.227 ± 0.053 | 13.623 ± 0.133 | 13.747 ± 0.077 |
| 20          |           | 0.738 ± 0.010 | ND            | 0.679 ± 0.001 | 10.384 ± 0.000 | 4.352 ± 0.002 | 30.232 ± 0.071 | 29.785 ± 0.001 |
| 21          |           | 0.550 ± 0.023 | 0.738 ± 0.018 | ND            | 6.775 ± 0.003  | 2.324 ± 0.121 | 14.881 ± 0.012 | 16.723 ± 0.037 |
| 22          |           | 0.127 ± 0.002 | ND            | 0.054 ± 0.054 | 2.932 ± 0.186  | 0.198 ± 0.198 | 5.471 ± 5.471  | 5.736 ± 1.147  |
| 23          |           | ND            | ND            | 0.165 ± 0.027 | 2.517 ± 0.004  | 2.193 ± 0.011 | 8.863 ± 0.052  | 9.274 ± 0.024  |
| 24          |           | 0.108 ± 0.005 | 0.553 ± 0.026 | 0.191 ± 0.020 | 1.724 ± 0.024  | ND            | 5.045 ± 0.035  | 5.273 ± 0.062  |

ND: Not detected. 1–24 stand for different RA samples, as shown in Table 8.

**Table S3.** Monosaccharide contents of Fraction C from different RA samples ( $\bar{X} \pm SD$ ) ( $\mu\text{g/g}$ ).

| Content No. | Varieties | Fraction C      |                 |                  |                 |                 |                 |                 |
|-------------|-----------|-----------------|-----------------|------------------|-----------------|-----------------|-----------------|-----------------|
|             |           | Rhamnose        | Fucose          | Arabinose        | Xylose          | Mannose         | Glucose         | Galactose       |
| 1           |           | 0.017 ± 0.0034  | 0.0072 ± 0.0001 | 1.6826 ± 0.2246  | 2.493 ± 0.177   | 0.1966 ± 0.0189 | 0.4674 ± 0.0279 | 0.5806 ± 0.0262 |
| 2           |           | 0.0122 ± 0.0017 | 0.0073 ± 0      | 1.3649 ± 0.1123  | 2.2427 ± 0.0885 | 0.2233 ± 0.0094 | 0.5068 ± 0.0139 | 0.5435 ± 0.0131 |
| 3           |           | 0.004 ± 0.0015  | 0.0071 ± 0.0003 | 0.939 ± 0.3752   | 1.4152 ± 0.4696 | 0.0536 ± 0.0411 | 0.2453 ± 0.0646 | 0.2404 ± 0.1334 |
| 4           |           | 0.0146 ± 0.0058 | 0.0072 ± 0.0001 | 1.5238 ± 0.3012  | 2.3679 ± 0.5851 | 0.21 ± 0.12     | 0.4871 ± 0.1849 | 0.5621 ± 0.2144 |
| 5           |           | 0.0081 ± 0.0017 | 0.0068 ± 0.0001 | 1.1519 ± 0.1123  | 1.829 ± 0.0885  | 0.1384 ± 0.0094 | 0.3761 ± 0.0139 | 0.3919 ± 0.0131 |
| 6           |           | 0.0128 ± 0.0004 | 0.0072 ± 0.0001 | 1.1321 ± 0.1646  | 2.0876 ± 0.1097 | 0.1765 ± 0.0331 | 0.3876 ± 0.0843 | 0.4872 ± 0.0398 |
| 7           |           | 0.0096 ± 0.0005 | 0.5691 ± 0.1215 | 30.026 ± 4.6707  | 0.153 ± 0.0242  | 0.0486 ± 0.0087 | 0.0635 ± 0.004  | 0.5815 ± 0.113  |
| 8           |           | 0.0103 ± 0.0002 | 0.3972 ± 0.0608 | 23.4207 ± 2.3353 | 0.1188 ± 0.0121 | 0.0363 ± 0.0043 | 0.0579 ± 0.002  | 0.4217 ± 0.0565 |
| 9           |           | 0.0099 ± 0.0001 | 0.4832 ± 0.0304 | 26.7233 ± 1.1677 | 0.1359 ± 0.006  | 0.0425 ± 0.0022 | 0.0607 ± 0.001  | 0.5016 ± 0.0283 |
| 10          |           | 0.0098 ± 0.0004 | 0.5261 ± 0.0911 | 28.3747 ± 3.503  | 0.1445 ± 0.0181 | 0.0455 ± 0.0065 | 0.0621 ± 0.003  | 0.5415 ± 0.0848 |
| 11          |           | 0.0101 ± 0.0006 | 0.4402 ± 0.0833 | 25.072 ± 3.683   | 0.1274 ± 0.017  | 0.0394 ± 0.0021 | 0.0593 ± 0.004  | 0.4616 ± 0.0236 |
| 12          |           | 0.0087 ± 0.0002 | 0.4513 ± 0.0608 | 24.8175 ± 2.3353 | 0.129 ± 0.0121  | 0.0456 ± 0.0043 | 0.0578 ± 0.002  | 0.5481 ± 0.0565 |
| 13          |           | 0.0244 ± 0.0057 | 0.0376 ± 0.0111 | 5.2165 ± 0.9252  | 1.9366 ± 0.2346 | 0.1921 ± 0.011  | 0.7987 ± 0.0126 | 1.1599 ± 0.1264 |
| 14          |           | 0.0163 ± 0.0028 | 0.0219 ± 0.0056 | 3.908 ± 0.4626   | 1.6048 ± 0.1173 | 0.1765 ± 0.0055 | 0.7809 ± 0.0063 | 0.9812 ± 0.0632 |
| 15          |           | 0.0204 ± 0.0014 | 0.0298 ± 0.0028 | 4.5623 ± 0.2313  | 1.7707 ± 0.0587 | 0.1843 ± 0.0028 | 0.7898 ± 0.0031 | 1.0706 ± 0.0316 |
| 16          |           | 0.0224 ± 0.0043 | 0.0337 ± 0.0083 | 4.8894 ± 0.6939  | 1.8537 ± 0.176  | 0.1882 ± 0.0083 | 0.7943 ± 0.0094 | 1.1152 ± 0.0948 |
| 17          |           | 0.0183 ± 0.0032 | 0.0258 ± 0.0071 | 4.2351 ± 0.6299  | 1.6878 ± 0.0436 | 0.1804 ± 0.0035 | 0.7854 ± 0.0017 | 1.0259 ± 0.0406 |
| 18          |           | 0.0198 ± 0.0028 | 0.0276 ± 0.0056 | 4.3257 ± 0.4626  | 1.875 ± 0.1173  | 0.1872 ± 0.0055 | 0.7963 ± 0.0063 | 1.1025 ± 0.0632 |
| 19          |           | 0.0093 ± 0.001  | 0.7262 ± 0.0596 | 35.631 ± 3.7537  | 0.2195 ± 0.0204 | 0.0144 ± 0.0071 | 0.0759 ± 0.0007 | 0.7327 ± 0.035  |
| 20          |           | 0.0079 ± 0.0004 | 0.6419 ± 0.0161 | 30.3224 ± 2.7867 | 0.1907 ± 0.0135 | 0.0244 ± 0.0042 | 0.0769 ± 0.0004 | 0.6832 ± 0.0251 |
| 21          |           | 0.0088 ± 0.0002 | 0.7035 ± 0.0184 | 31.69 ± 1.3933   | 0.2005 ± 0.0067 | 0.0204 ± 0.0021 | 0.0765 ± 0.0002 | 0.6972 ± 0.0125 |
| 22          |           | 0.009 ± 0.0007  | 0.7001 ± 0.0482 | 33.6605 ± 3.2702 | 0.21 ± 0.0169   | 0.0174 ± 0.0057 | 0.0762 ± 0.0006 | 0.715 ± 0.03    |
| 23          |           | 0.0083 ± 0.0005 | 0.658 ± 0.0387  | 31.0062 ± 2.5544 | 0.1956 ± 0.0055 | 0.0224 ± 0.003  | 0.0767 ± 0.0017 | 0.6902 ± 0.0563 |
| 24          |           | 0.0086 ± 0.0006 | 0.6714 ± 0.0435 | 32.0185 ± 0.9671 | 0.2273 ± 0.0069 | 0.0186 ± 0.0028 | 0.0735 ± 0.0003 | 0.6531 ± 0.0099 |

1–24 stand for different RA samples, as shown in Table 8.

**Table S4.** Monosaccharide contents of Fraction D from different RA samples ( $\bar{X} \pm SD$ ) ( $\mu\text{g/g}$ ).

| Content<br>No. | Varieties | Fraction D      |                 |                  |                 |                 |                 |                 |
|----------------|-----------|-----------------|-----------------|------------------|-----------------|-----------------|-----------------|-----------------|
|                |           | Rhamnose        | Fucose          | Arabinose        | Xylose          | Mannose         | Glucose         | Galactose       |
| 1              |           | 0.0398 ± 0.0065 | ND              | 4.1071 ± 0.5505  | 0.0228 ± 0.0007 | 0.0566 ± 0.0069 | 0.4023 ± 0.0223 | 0.3571 ± 0.0281 |
| 2              |           | 0.0306 ± 0.004  | ND              | 3.3286 ± 0.2755  | 0.0238 ± 0.0005 | 0.0468 ± 0.0037 | 0.4338 ± 0.0111 | 0.3968 ± 0.014  |
| 3              |           | 0.0352 ± 0.0049 | ND              | 3.7179 ± 0.4129  | 0.0233 ± 0.0005 | 0.0517 ± 0.0052 | 0.4181 ± 0.0167 | 0.377 ± 0.0211  |
| 4              |           | 0.0342 ± 0.0033 | ND              | 3.7175 ± 0.2752  | 0.0235 ± 0.0004 | 0.0513 ± 0.0035 | 0.418 ± 0.0111  | 0.377 ± 0.014   |
| 5              |           | 0.0329 ± 0.0025 | ND              | 3.5232 ± 0.275   | 0.0236 ± 0.0002 | 0.0493 ± 0.0032 | 0.4259 ± 0.0112 | 0.3869 ± 0.014  |
| 6              |           | 0.0317 ± 0.0008 | ND              | 3.8273 ± 0.3526  | 0.023 ± 0.0006  | 0.0479 ± 0.0008 | 0.4132 ± 0.0146 | 0.3782 ± 0.0132 |
| 7              |           | 0.032 ± 0.0035  | 0.0032 ± 0.0012 | 1.0717 ± 0.1776  | 0.0194 ± 0.0023 | 0.0235 ± 0.0023 | 0.3633 ± 0.0116 | 0.359 ± 0.0122  |
| 8              |           | 0.027 ± 0.0018  | 0.0049 ± 0.0006 | 1.3229 ± 0.0888  | 0.0161 ± 0.0012 | 0.0202 ± 0.0012 | 0.3469 ± 0.0058 | 0.3417 ± 0.0061 |
| 9              |           | 0.0295 ± 0.0009 | 0.0041 ± 0.0003 | 1.1973 ± 0.0444  | 0.0178 ± 0.0006 | 0.0219 ± 0.0006 | 0.3551 ± 0.0029 | 0.3504 ± 0.0031 |
| 10             |           | 0.0308 ± 0.0027 | 0.0036 ± 0.0009 | 1.1345 ± 0.1332  | 0.0186 ± 0.0018 | 0.0227 ± 0.0018 | 0.3592 ± 0.0087 | 0.3547 ± 0.0092 |
| 11             |           | 0.0283 ± 0.0022 | 0.0045 ± 0.0007 | 1.2601 ± 0.1177  | 0.0169 ± 0.0027 | 0.021 ± 0.0006  | 0.351 ± 0.004   | 0.346 ± 0.0144  |
| 12             |           | 0.0289 ± 0.0018 | 0.0042 ± 0.0006 | 1.2381 ± 0.0888  | 0.0156 ± 0.0012 | 0.0243 ± 0.0012 | 0.3577 ± 0.0058 | 0.3386 ± 0.0061 |
| 13             |           | 0.0167 ± 0.0011 | ND              | 3.4773 ± 0.1853  | 0.0096 ± 0.0013 | 0.0277 ± 0.0011 | 0.3136 ± 0.0603 | 0.2957 ± 0.0573 |
| 14             |           | 0.0182 ± 0.0005 | ND              | 3.7394 ± 0.0927  | 0.0115 ± 0.0007 | 0.0292 ± 0.0005 | 0.3989 ± 0.0302 | 0.3767 ± 0.0286 |
| 15             |           | 0.0175 ± 0.0003 | ND              | 3.6084 ± 0.0463  | 0.0106 ± 0.0003 | 0.0285 ± 0.0003 | 0.3563 ± 0.0151 | 0.3362 ± 0.0143 |
| 16             |           | 0.0171 ± 0.0101 | ND              | 3.5428 ± 1.6455  | 0.0101 ± 0.0071 | 0.0281 ± 0.0147 | 0.3349 ± 0.1768 | 0.316 ± 0.1745  |
| 17             |           | 0.031 ± 0.0093  | ND              | 5.8043 ± 0.9616  | 0.0196 ± 0.0043 | 0.0486 ± 0.0078 | 0.5637 ± 0.0778 | 0.5425 ± 0.1357 |
| 18             |           | 0.0298 ± 0.0005 | ND              | 4.8372 ± 0.0927  | 0.0157 ± 0.0007 | 0.0387 ± 0.0005 | 0.4236 ± 0.0302 | 0.4876 ± 0.0286 |
| 19             |           | 0.0928 ± 0.0109 | 0.0124 ± 0.0009 | 15.2504 ± 3.9705 | 0.0443 ± 0.0003 | 0.0812 ± 0.0359 | 1.2461 ± 0.0806 | 1.2146 ± 0.0828 |
| 20             |           | 0.0774 ± 0.0054 | 0.0111 ± 0.0005 | 9.6353 ± 1.9852  | 0.0439 ± 0.0001 | 0.1319 ± 0.0179 | 1.3601 ± 0.0403 | 1.3317 ± 0.0414 |
| 21             |           | 0.0851 ± 0.0027 | 0.0118 ± 0.0002 | 12.4429 ± 0.9926 | 0.0441 ± 0.0001 | 0.1066 ± 0.009  | 1.3031 ± 0.0202 | 1.2732 ± 0.0207 |
| 22             |           | 0.089 ± 0.0082  | 0.0121 ± 0.0007 | 13.8466 ± 2.9779 | 0.0442 ± 0.0002 | 0.0939 ± 0.0269 | 1.2746 ± 0.0605 | 1.2439 ± 0.0621 |
| 23             |           | 0.0813 ± 0.0144 | 0.0114 ± 0.0011 | 11.0391 ± 3.0245 | 0.044 ± 0.0037  | 0.1192 ± 0.0121 | 1.3316 ± 0.075  | 1.3024 ± 0.0497 |
| 24             |           | 0.0724 ± 0.0054 | 0.0108 ± 0.0005 | 10.9731 ± 1.9852 | 0.0391 ± 0.0001 | 0.0983 ± 0.0179 | 1.3521 ± 0.0403 | 1.2849 ± 0.0414 |

ND: Not detected. **1–24** stand for different RA samples, as shown in Table 8.
